# Supplementary material
Source: HighWire-hosted journal article supplement (https://msystems.asm.org/content/2/5/e00086-17)

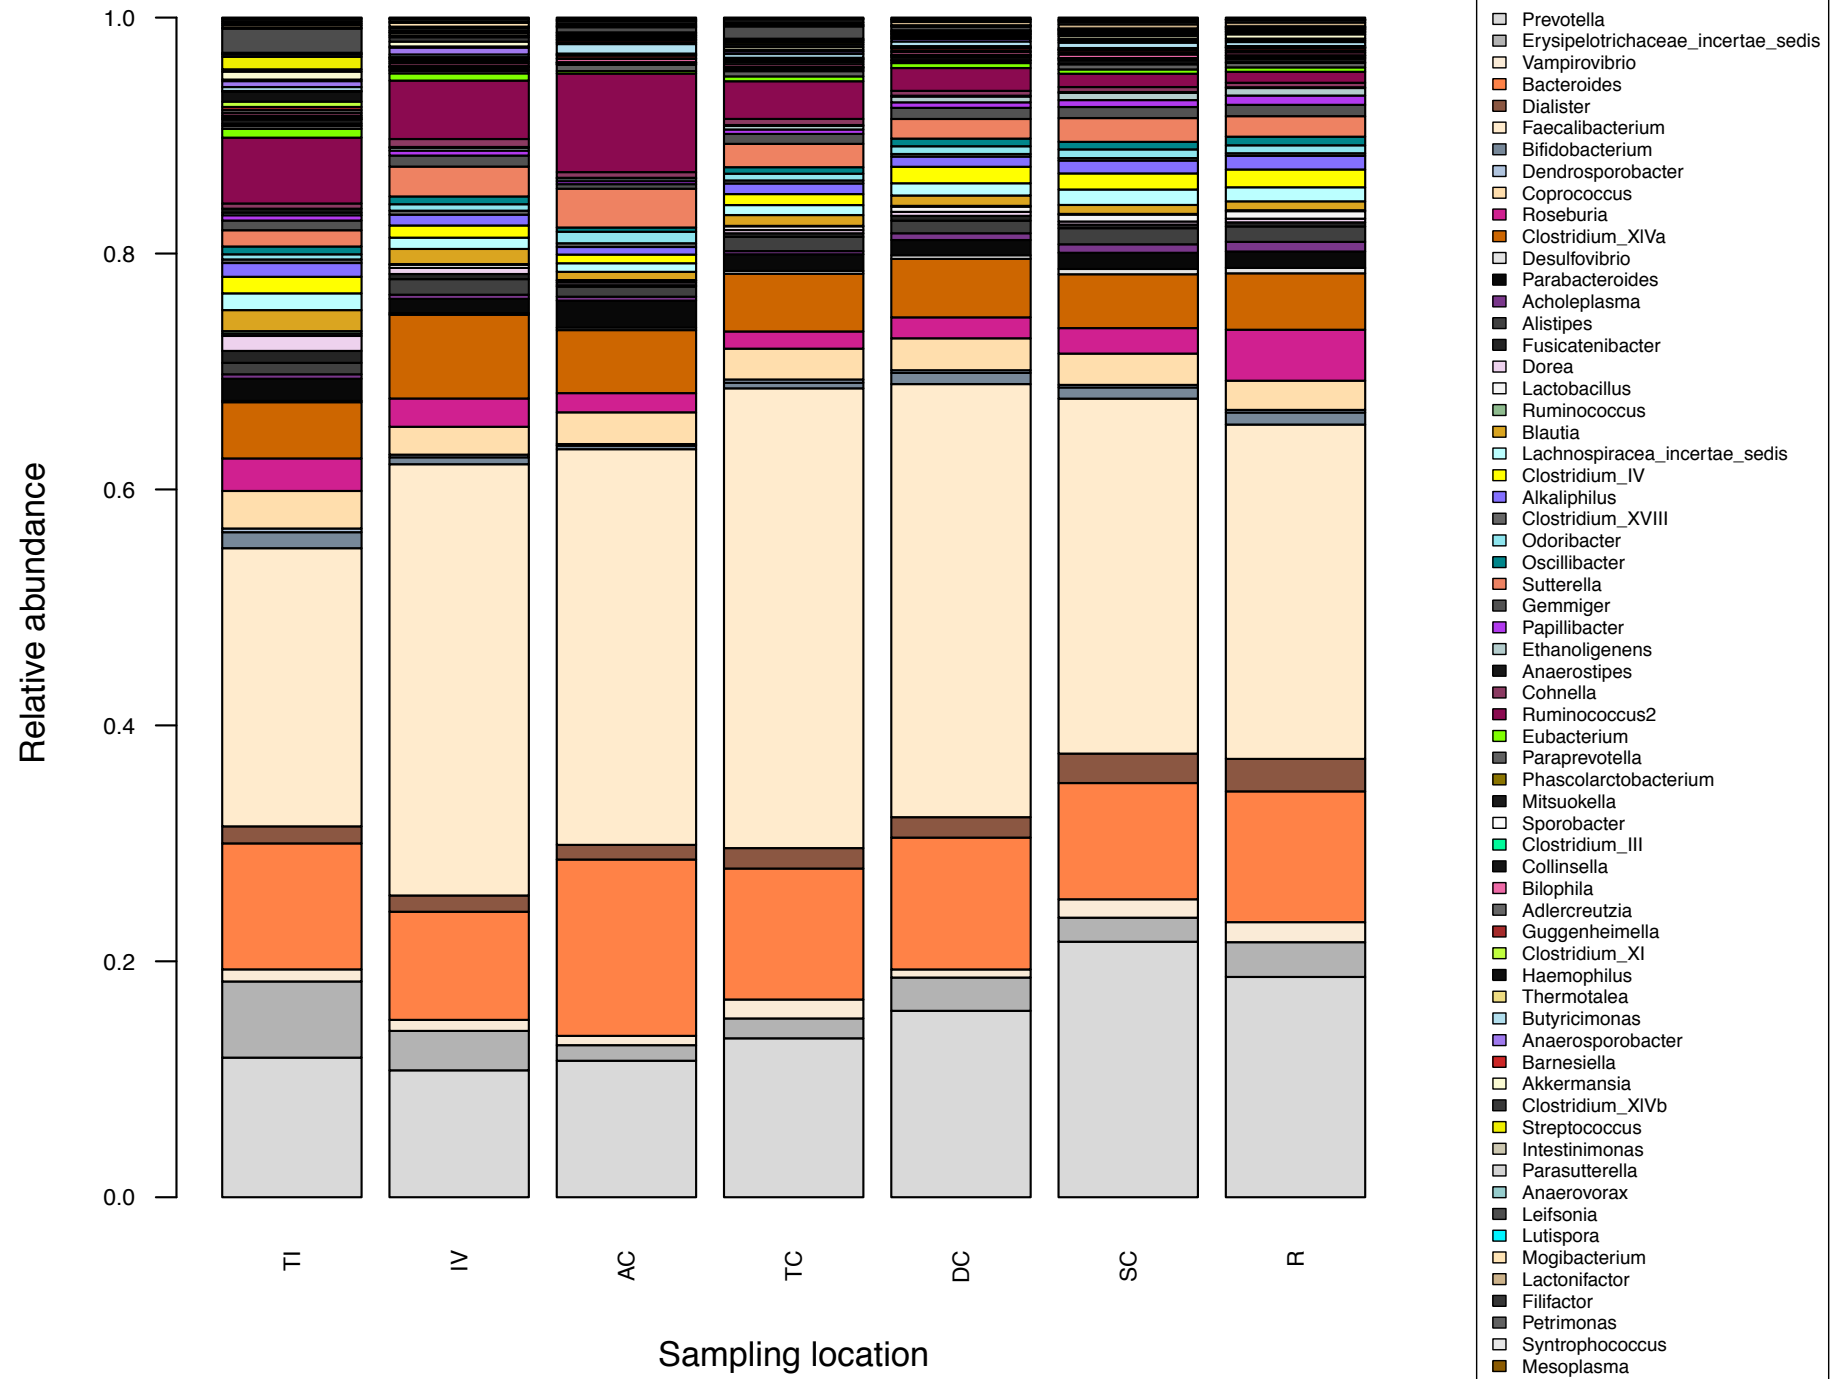

Supplement: inline-supplementary-material-5 [file inline-supplementary-material-5.pdf]
